## GENOMIC BASIS OF CIRCANNUAL RHYTHM IN THE EUROPEAN CORN BORER MOTH

### Authors:

Genevieve M. Kozak<sup>a,1</sup>, Crista B. Wadsworth<sup>a,2</sup>, Shoshanna C. Kahne<sup>a,3</sup>, Steven M. Bogdanowicz<sup>b</sup>, Richard G. Harrison<sup>b,4</sup>, Brad S. Coates<sup>c</sup>, Erik B. Dopman<sup>a</sup>

<sup>a</sup> Department of Biology, Tufts University, 200 Boston Ave., Ste. 4700, Medford, MA, 02155

<sup>b</sup> Department of Ecology and Evolutionary Biology, 215 Tower Rd., Cornell University, Ithaca, NY, 14853

<sup>c</sup> USDA-ARS, Corn Insects and Crop Genetics Research Unit, 103 Genetics Laboratory, 2333 Pammel Dr Ames, IA, 50011

<sup>1</sup> corresponding author, current address:

Genevieve Kozak; [gkozak@umassd.edu](mailto:gkozak@umassd.edu)

Department of Biology, University of Massachusetts-Dartmouth, 285 Old Westport Road, Dartmouth, MA 02747

<sup>2</sup> current address: Department of Immunology and Infectious Diseases, Harvard T.H. Chan School of Public Health, Boston, MA 02115

<sup>3</sup> current address: Department of Microbiology, New York University, New York, NY, 10003

<sup>4</sup> Posthumous

1 **ABSTRACT**

2 Genetic variation in life-history timing allows populations to synchronize with seasonal cycles but little is  
3 known about the molecular mechanisms that produce differences in circannual rhythm in nature. Changes  
4 in diapause timing in the European corn borer moth (*Ostrinia nubilalis*) have facilitated rapid response to  
5 shifts in winter length encountered during range expansion and from climate change, with some  
6 populations emerging from diapause earlier to produce an additional generation per year. We identify  
7 genomic variation associated with changes in the time spent in winter diapause and show evidence that the  
8 circadian clock genes period (*per*) and pigment dispersing factor receptor (*Pdfr*) interact to underlie this  
9 adaptive polymorphism in circannual rhythm. *Per* and *Pdfr* are located within two epistatic QTL, strongly  
10 differ in allele frequency among individuals that pupate earlier or later, have the highest linkage  
11 disequilibrium among gene pairs in the QTL regions despite separation by > 4 megabases, and possess  
12 amino-acid changes likely to affect function. One *per* mutation in linkage disequilibrium with *Pdfr* creates  
13 a novel putative clock-cycle binding site found exclusively in populations that pupate later. We find  
14 associated changes in free-running daily circadian rhythm, with longer daily rhythms in individuals that end  
15 diapause early. These results support a modular connection between circadian and circannual timers and  
16 provide testable hypotheses about the physiological role of the circadian clock in seasonal synchrony.  
17 Winter length is expected to continually shorten from climate warming and we predict these gene  
18 candidates will be targets of selection for future adaptation and population persistence.

19  
20  
21 **KEYWORDS:** diapause, phenology, circadian clock, seasonal timing, allochronic isolation, *Ostrinia*  
22  
23

## 24 INTRODUCTION

25 Many species display tremendous flexibility in the annual timing of physiological, morphological, and  
26 behavioral transitions that enable survival in seasonal environments. The capacity to adjust the timing of  
27 circannual rhythms and track local seasonal cycles can facilitate expansion into new geographic areas with  
28 different seasonal environments (1, 2). Dramatic shifts in seasonal timing seen across plants and animals in  
29 recent decades (3) may also enable adaptation (4) and persistence (5, 6) during rapid, anthropogenic  
30 alterations of the environment. When shifts in seasonal timing additionally change the number of  
31 generations per year (7-9), populations may grow faster and even tolerate a faster rate of sustained  
32 environmental change (Figure S1) (10). Nevertheless, if environments change too rapidly, timing  
33 mismatches with seasonality can occur (11, 12), resulting in loss of fitness and population decline (5, 6,  
34 12). The capacity to adjust seasonal timing and track changes in seasonal cycles, as well as our ability to  
35 evaluate risks to biodiversity, depends in part on the proximate causes of variation in circannual rhythm  
36 (10, 13). However, relatively little is known about the molecular basis of this diversity (11, 14, 15).

37  
38 Insects are highly variable in the seasonal timing of transitions into and out of diapause, a stress-tolerant  
39 physiological state that enables coping with seasonal challenges (1, 16-19). For temperate species, which  
40 generally use seasonal changes in photoperiod and temperature to synchronize diapause with winter stress,  
41 the timing of diapause transitions in spring and autumn varies widely within and among species (15, 20)  
42 and therefore provides an excellent opportunity for analysis of the genetic control of circannual timing. We  
43 used natural variation in timing of spring transitions from larval diapause to active development of the  
44 European corn borer moth (*Ostrinia nubilalis*) to understand the genetic basis of this seasonal adaptation.  
45 In corn borers, the duration of developmental arrest in the spring (i.e., diapause termination timing, (18))  
46 generally tracks winter length. Shifts in diapause timing have rapidly evolved across latitudinal gradients in  
47 winter after range expansion from Europe to North America in ~1910 (21, 22). The length of winter  
48 decreases with decreasing latitude in North America. Consequently, the optimal time to exit diapause is  
49 advanced to earlier in the year and the number of days required to end larval diapause evolved into a  
50 positive correlation with latitude (ranging from 17.5 to 49 days across 9.28°N latitude; Figure S2) (22).  
51 Changes in diapause timing similarly tracks shorter winters associated with climate warming, with  
52 populations at the same latitude showing a ~50% average reduction in time needed to transition out of  
53 diapause since the 1950s in some locations (22, 23). Although broad-scale changes in climate may be  
54 leading to directional change in diapause timing across space and over time, polymorphism is common in  
55 natural populations (24, 25) and may be maintained (26) because timing shifts alleviate competition for  
56 limiting resources (such as host plants) or may be favored by year-to-year fluctuations in seasons (27). In  
57 the mid-Atlantic region of the United States, earlier springtime pupation (~20 days) reduces generation  
58 time, thereby enabling production of two generations per year (bivoltine) rather than one generation per  
59 year (univoltine; Figure S3) (28, 29). Geographic co-occurrence of earlier- and later-pupating individuals  
60 (~40 days) leads to asynchronous adult mating flights (June versus July) and allochronic reproductive  
61 isolation (Figure S4) (29). Thus, in corn borers, range expansion and population growth, enhanced  
62 tolerance of environmental change, and speciation may all be byproducts of natural selection on diapause  
63 timing during seasonal adaptation (29, 30).

64  
65 Despite decades of work on *Ostrinia* (25, 26, 31-33), no causative loci for natural variation in diapause  
66 termination timing have been identified definitively. We have therefore taken an unbiased, whole-genome  
67 approach to identify loci underlying this variation. Previous work found sex-linked inheritance (31, 32) and  
68 evidence for a single quantitative trait locus (QTL) on the Z (sex) chromosome (25). However, a putative  
69 inversion encompassing 39% of the Z chromosome was discovered and the QTL was locked into a non-  
70 recombining region along with hundreds of genes, many of which were differentially expressed during  
71 diapause break (33-35). Subsequent work demonstrated that the recombination suppressor is polymorphic  
72 in field populations (35) and we therefore performed QTL mapping in pedigrees with putatively collinear Z  
73 chromosomes. An advantage of this approach is that it will exclusively identify the genetic architecture of  
74 diapause timing, but a challenge is that individual genes or mutations associated with trait differences  
75 cannot be easily identified. Therefore, we obtained the higher resolution needed using population genomic  
76 sequencing data derived from phenotyped, field-caught moths. As population genomic analysis will  
77 identify mutations within individual genes underlying changes in measured traits, as well as loci controlling  
78 unmeasured traits subject to correlated selection in nature (such as temperature tolerance), we view the

79 approaches as parts of a complementary, two-pronged forward-genetics strategy to characterize the genetics  
80 of natural variation in circannual rhythm.

81

82

## 83 RESULTS

### 84 *QTLs for diapause timing*

85 Our first forward genetic approach used QTL mapping of diapause termination timing. In corn borers, the  
86 main environmental trigger to end diapause is photoperiod (36, 37). The time required to end diapause and  
87 return to active development was quantified as the time to pupation under diapause-breaking photoperiod  
88 and temperature (referred to as post-diapause development (PDD) time). Variation in PDD time was  
89 measured in backcross pedigrees of females from a two-generation (bivoltine), early-emerging, short-PDD  
90 population collected in East Aurora, NY in 2011 (EA, PDD time < 19 days) and males from a one-  
91 generation (univoltine), later-emerging, long-PDD laboratory colony originally derived from Bouckville,  
92 NY in 2004 (BV, PDD time  $\geq$  39 days) (25, 28, 34, 35, 38). Diapause in 5<sup>th</sup> instar backcross larvae was  
93 induced by a winter-like short-day 12 hour (h) photoperiod. Subsequently, PDD time was measured as the  
94 number of calendar days required for diapausing larvae to pupate after transfer to a summer-like long-day  
95 (16 h) photoperiod. PDD time varied from 11 to 63 days. Using 167 autosomal and 18 Z-linked molecular  
96 markers, we found that only the Z chromosome was significantly associated with PDD time ( $N = 67$   
97 offspring, LOD = 9.67,  $P < 0.001$ ).

98

99 We refined the Z chromosome QTL map by including 226 offspring and 35 markers which resulted in the  
100 prediction of two adjacent, interacting QTL (Figure 1a). Model fit was improved by inclusion of QTL1 ( $F_2$   
101 = 22.89,  $P < 0.001$ ), QTL2 ( $F_2 = 9.09$ ,  $P < 0.001$ ), and their interaction ( $F_1 = 7.80$ ,  $P = 0.005$ ; Table S1;  
102 Figure 1c,e), indicating that natural variation for diapause termination time in the analyzed populations is  
103 regulated by at least two genes. Together these QTL and their interaction explained 35.3% of phenotypic  
104 variance. QTL1 was located at 29.5 cM ( $BCI = 24.5-31$  cM) (Figure 1b) and QTL2 was located at 34 cM  
105 ( $BCI = 31.5-36$  cM) (Figure 1c,d). QTL1 was estimated to be at  $\sim 3.1$  Mb in size (on the 21 Mb Z  
106 chromosome), containing  $\sim 48$  genes with annotations in draft European corn borer moth genome (GenBank  
107 BioProject: PRJNA534504; Accession SWFO00000000; Supplemental Material; Table S2). QTL2 was  
108 estimated to be  $\sim 3.7$  Mb in size with  $\sim 42$  annotated genes. The QTL1 allele originating from the parental  
109 strain expressing shorter PDD time (EA) was epistatic to allelic changes at QTL2 and masked its effect  
110 (two-way ANOVA,  $F_{1,218} = 8.76$ ,  $P = 0.003$ ; Figure S5). In contrast, an allele at QTL1 originating from the  
111 parental strain expressing longer PDD time (BV) resulted in an unusually long PDD time when paired with  
112 a QTL2 allele from a short-PDD time parent (EA) (mean PDD time  $\pm$  SD: QTL1<sub>BV</sub>/QTL2<sub>EA</sub> =  $51 \pm 11.92$ ,  
113 QTL1<sub>BV</sub>/QTL2<sub>BV</sub> mean PDD time =  $39.52 \pm 8.05$ ).

114

### 115 *Genetic variation in natural populations*

116 We used genome sequencing of wild populations as a second forward genetic approach to identify  
117 segregating chromosomal regions affecting diapause timing. We tested for associations with PDD time in  
118 pooled sequencing (pool-seq) data derived from field collections of 5 populations (Table S3). In addition to  
119 a pool of individuals from the EA population ( $N = 34$ ; mean PDD time =  $9.8 \pm 1.2$  days) and a  
120 separate field collected pool from the BV population ( $N = 20$ ; mean PDD time =  $42.9 \pm 7.9$  days), we  
121 sequenced pools from Penn Yan, NY (PY,  $N = 26$ ; univoltine, long; mean PDD time =  $52.9$  days  $\pm 5.3$ ),  
122 Geneva, NY (GEN,  $N = 25$ ; univoltine, long; mean PDD time =  $45.3$  days  $\pm 5.4$ ), and Landisville, PA (LA,  
123  $N = 39$ ; bivoltine, short; PDD time < 19 days). Paired-end 150 bp Illumina reads were aligned to the draft  
124 European corn borer moth genome ordered and oriented into 31 chromosomes (61% of 454.7 Mb assigned  
125 locations genome-wide; 20.9 Mb of the Z chromosome ordered; Table S4). Average coverage was 25X  
126 (range = 12-40X).

127

128 Overall genetic differentiation was low among populations as estimated from mean pairwise  $F_{ST}$  across 1  
129 kb windows (mean autosomal  $F_{ST} = 0.05$ ; Z chromosome  $F_{ST} = 0.06$ ) with the highest values of  $F_{ST}$   
130 between short and long populations observed on the Z chromosome in the QTL regions (Figure 2, Figure  
131 S6). To identify gene regions associated with PDD time while directly accounting for population  
132 demography we used a Bayesian framework. BayPASS 2.1 (39) was used to estimate a covariance matrix  
133 that represents an approximation of the unknown demographic history and test associations of single  
134 nucleotide polymorphisms (SNPs) with PDD time while accounting for any covariance. BayPASS was run

135 separately for Z chromosome and autosomal loci, as our expectations about the demographic history and  
136 number of haploid chromosomes in each pool differed between sex chromosomes and autosomes (see  
137 methods). Significantly associated alleles were defined as containing SNPs with a Bayes Factor (BF) > 20  
138 deciban units (*dB*), correlation coefficient ( $r$ )  $\geq 0.5$ , and strength of association ( $\beta$ ) with a posterior  
139 distribution that had a probability < 0.01% of  $\beta = 0$  (“empirical Bayesian P-value”  $eBP_{is} > 2$ ) (39, 40). The  
140 autosomal analysis identified 7 SNPs in predicted genes with BF > 20 *dB*, but all of these had  $eBP_{is} < 0.5$ .  
141 On the Z chromosome, 16 of 8,435 SNPs in predicted genes had BF > 20 *dB* and showed a strong  
142 association with PDD time ( $r \geq 0.57$ ). However, only four Z-linked SNPs (0.05%) in predicted genes had  
143  $eBP_{is} > 2$ . Congruent with our mapping results, all SNPs with  $eBP_{is} > 2$  fell inside the two interacting QTL  
144 regions (Table 1a; Figure 2c) and three were within two genes known to interact in the same pathway—the  
145 circadian clock genes period (*per*) and pigment-dispersing factor receptor (*Pdfr*). One SNP was within  
146 QTL1 in *per* (Figure 3a; Table S5), a core circadian clock gene (41), and two SNPs within QTL2 were in  
147 *Pdfr*, the gene encoding the receptor for the main circadian neurotransmitter PDF (42, 43). The remaining  
148 SNP with  $eBP_{is} > 2$  was within terribly reduced optic lobes (*trol*) (Figure 3b) which encodes an  
149 extracellular matrix protein and is not known to interact with *per* (44). Two additional intergenic SNPs with  
150  $eBP_{is} > 2$  were between *Pdfr* and *trol* (Figure 3b). No additional outlier loci were detected when we  
151 analyzed all genome scaffolds (including those lacking an assigned chromosomal location) as if they were  
152 on the Z chromosome, indicating that *per* and *Pdfr* have the strongest association with PDD time across the  
153 entire sequenced genome (Figure S7-S8). *Per* and *Pdfr* also displayed extreme values of  $F_{ST}$  (> 0.5) and  
154 significance ( $q < 10^{-10}$ ) in Cochran-Mantel-Haenszel (CMH) outlier tests (45) (see supplemental results;  
155 Table S6; Figure S9).

156  
157 Linkage mapping indicated two QTL located ~4.5 cM (~ 5 Mb) apart contribute to the evolution of PDD  
158 time. In wild populations, alleles in QTL1 and QTL2 associated with PDD time should be in high linkage  
159 disequilibrium (LD) due to their joint effect on the phenotype. To measure LD, we resequenced the  
160 genomes of individual moths from all 5 populations with long ( $N = 18$ ) and short ( $N = 25$ ) PDD times using  
161 150 bp paired-end Illumina sequencing at 14X coverage (mean coverage =  $14.22 \pm 4.55$ ). We calculated  $r^2$   
162 between SNPs in 627 genes on different genome scaffolds of the Z chromosome  $\leq 10$  Mb apart for a total  
163 of 41,193 biallelic SNPs with MAF  $\geq 0.25$  (since 18/43 individuals had long PDD, only SNPs with a high  
164 minor allele frequency represent potential candidate mutations underlying PDD time). LD was high for  
165 genes < 2 Mb apart (maximum LD = 0.97, 99.9% quantile = 0.77), but decayed over larger physical  
166 distances (2-10 Mb: maximum LD = 0.77, 99.9% quantile = 0.56).

167  
168 We identified LD outliers by calculating a 95% confidence interval for the 99.9% quantile of all gene pairs  
169 within a 1 Mb window ( $N = 10,000$  bootstrap replicates). Among gene pairs located within or between the  
170 two QTL regions ( $\geq 2$  Mb apart and  $\leq 7$  Mb), there were 12 outliers (Figure S10; Table S7). Of these, the  
171 most extreme LD outlier was between *per* and *Pdfr* (Figure 4; Figure S11) and specifically, maximum LD  
172 occurred between 9 SNPs in the 5'UTR intron of *Pdfr* and 3 SNPs in the 5'UTR intron of *per* ( $r^2 = 0.75$ ). In  
173 both genes, introns within the 5' UTR contain E-box *cis*-regulatory enhancer elements where the circadian  
174 transcription factors CLOCK (CLK) and CYCLE (CYC) bind (46, 47). In *Drosophila melanogaster*, *Pdfr*  
175 contains one CLK-CYC binding site in the 5'UTR intron and *per* contains three in the 5'UTR intron and  
176 one E-box upstream of the promoter (46-47). The long-PDD corn borer allele for one of the high LD SNPs  
177 created a novel E-box element (CACGTG) in the 5'UTR and this allele was completely absent in the short-  
178 PDD populations (Table 1b). Additionally, *per* and *Pdfr* were present in other outlier gene pairs (*Pdfr* with  
179 the genes *magu* and *CG6752*; *per* with genes flanking *Pdfr*: *trol*, *meigo*, and *CG32809*), and one pair  
180 contained the circadian gene *clk* with 1-Cys peroxiredoxin (*Prx6005*). We also performed LD analysis on  
181 the outlier SNPs identified by BayPASS ( $eBP_{is} > 2$ ) with all other SNPs (>1 Mb apart; MAF  $\geq 0.25$ ) and  
182 found the 2 outlier SNPs in *Pdfr* had the highest LD with SNPs in *per* ( $r^2 = 0.73$ ) and the single SNP in *per*  
183 had the highest LD with SNPs in *Pdfr* ( $r^2 = 0.61$ ). The SNP in *trol* had the highest LD with autophagy-  
184 related 9 (*Atg9*;  $r^2 = 0.53$ ).

185  
186 Our genome-wide Bayesian and linkage disequilibrium outlier analyses suggest that *per* and *Pdfr* represent  
187 the best gene candidates in QTL1 and QTL2, respectively. We analyzed variation in the resequenced  
188 individuals using a case/control association analysis in plink (48) to detect other mutations within *per* and  
189 *Pdfr* that might have a phenotypic effect, such as changes in amino acids, changes in splice junctions  
190 leading to splice variants, and large structural variants that disrupt exons or *cis*-regulatory regions (other

191 than E-boxes) (Table S9-S10). Using homology with *per* in other insects, we identified protein domains (27  
192 exons) in the corn borer ortholog. Three nonsynonymous SNPs were significantly associated with PDD  
193 time and all were located in *per* exon 23 (Table 1c; outlined in red in Figure 5a). Both proline/threonine  
194 (P/T) and serine/proline (S/P) polymorphisms are in a 33 amino-acid region of *per* that is deleted in an  
195 artificially selected line of flesh fly (*Sacrophaga bullata*) showing enhanced diapause and the S/P  
196 polymorphism is 3 residues away from a 9 amino-acid insertion in a selected flesh fly line with decreased  
197 diapause (Figure 5a) (49). No consistent associations were found among splice variants, PDD time, and  
198 polymorphisms at splice sites (see Supplemental Information), nor were any large structural variants  
199 detected in within the gene.

200  
201 *Pdfr* consisted of 12 exons (Figure 5b). In the predicted extracellular hormone binding domain for PDF  
202 (exon 2) there was one nonsynonymous SNP, coding for a methionine in short PDD individuals and a  
203 threonine in long PDD individuals ( $q = 1.12 \times 10^{-8}$ ; Figure 4b; Table 1c). There were no splice junction  
204 polymorphisms or variants in *Pdfr*. Although its specific sequence is unknown, an enhancer is located ~8.5  
205 kb upstream of *Pdfr* in *D. melanogaster* (42). In corn borers, we found a ~419 kb inversion associated with  
206 PDD time ( $q = 6.48 \times 10^{-9}$ ) with one breakpoint 7.05 kb upstream from *Pdfr* in this putative enhancer  
207 region. The second breakpoint was predicted to occur 162 kb after *trol*.

### 208 209 **Circadian activity**

210 Prior work has shown that circadian rhythm of locomotor activity in mice, fruit flies, and humans is the  
211 behavioral output of circadian clock genes (50) and that mutations in *per* and *Pdfr* result in altered  
212 circadian rhythms in *D. melanogaster* (43, 51). We evaluated evidence for a difference in free-running  
213 circadian rhythm under total darkness (DD) between adult moths with short and long PDD times. Male  
214 pupae entrained to 16:8 were transferred to DD shortly before eclosion. We found that endogenous period  
215 length ( $\tau$ ) differed by approximately 1.3 hours, with short-PDD males showing longer average circadian  
216 periods ( $\tau = 22.7 \pm 0.2$  h,  $N = 24$ ) than long-PDD males ( $\tau = 21.4 \pm 0.28$  h,  $N = 22$ ) (ANOVA,  $F_{1,44} =$   
217 13.79,  $P < 0.001$ ; Figure 6; Supplemental Results).

### 218 219 220 **DISCUSSION**

221 Genetic changes in circadian clock genes associate with natural variation in the time needed to end winter  
222 diapause and return to active springtime development in the European corn borer. Clock genes *per* and *Pdfr*  
223 are located within two epistatic QTL, strongly differ in allele frequency among individuals that pupate  
224 earlier or later, have the highest linkage disequilibrium among gene pairs in the QTL regions, and possess  
225 amino-acid changes that may affect protein function. *Per* alleles containing an additional putative CLK-  
226 CYC binding site were also exclusively identified in populations that pupate later. While additional work is  
227 needed to understand how identified allelic variants affect gene function and to verify that there are no  
228 other genetic polymorphisms contributing to diversity in seasonal timing, our combined results suggest that  
229 allelic variation in *per* and *Pdfr* is causal to evolution of diapause timing when confronting rapid  
230 environmental changes associated with range expansion (Figure S2) (22) and human-induced climate  
231 warming (23).

232  
233 The presence of epistatic QTL indicates that genes underlying PDD time are likely members of the same  
234 genetic pathway. Both *per* and *Pdfr* interact in circadian pacemaker neurons in insect brains, where they  
235 synchronize biological activity to daily cycles of night and day (Figure 7) (52-54). In the laboratory,  
236 mutations in *per* are known to alter the length of the circadian activity period (51) and null mutants lose  
237 rhythm completely in *D. melanogaster* (41). Likewise, *Pdfr* is integral to the function of circadian  
238 pacemaker neurons in insect brains, where they receive secreted PDF neuropeptides that coordinate,  
239 synchronize, and reset the clock neuron network to new light cycles (55-57). Loss of expression of *Pdf* or  
240 *Pdfr* in these neurons can result in shorter circadian activity period ( $\tau$ ), abnormal peaks of circadian  
241 activity, and an inability to entrain to longer photoperiods in *D. melanogaster* (55, 58-60). Although robust  
242 connections between circadian clock genes and seasonal phenotypes have been discovered in plants (61),  
243 evidence in insects has been primarily based on RNAi studies demonstrating that functional clock genes are  
244 essential for diapause (62-64). It is less clear whether allelic variation in these genes typically responds to  
245 selection in natural populations to drive changes in the seasonal timing of diapause transitions. For  
246 example, polymorphism in the timeless gene in *D. melanogaster* influences diapause capacity in the

247 laboratory, but in nature, latitudinal variation of timeless does not match variation in diapause and observed  
248 patterns are opposite of those predicted (65). Instead, diapause differences are more strongly associated  
249 with non-circadian genes, such as couch potato (66). Similarly, in *Wyeomyia smithii* pitcher plant  
250 mosquitos diapause appears to be independent of the circadian pathway, with these traits evolving  
251 separately in selection lines (67). Our study provides the first evidence that *per* and *Pdfr*, core components  
252 of the molecular clock, are associated with the duration of developmental arrest for insects in the spring.  
253 Recent studies in two other insects show that *per* alleles are associated with polymorphism in the timing of  
254 autumnal initiation of diapause (critical photoperiod for entrance) (68, 69). Genetic changes at *per* may  
255 therefore provide the capacity to adjust diapause transition times across two different seasons, enabling  
256 insects to synchronize with both the end and beginning of winter.

257  
258 In 1936, Bünning hypothesized that mechanisms underlying circadian rhythmicity control circannual  
259 rhythmicity (70). Alternatively, the circadian clock and the seasonal timer could act as two modules with  
260 largely separate genes, although individual genes may have cross-module effects (71-73). We find that  
261 populations of European corn borer moth differing in PDD time also differ in their internal circadian  
262 oscillator, such that the population spending more time in diapause (long PDD time) shows an accelerated  
263 circadian period (shorter  $\tau$ ). A similar inverse relationship between circadian and circannual rhythm has  
264 been found in Scandinavian flies (*Drosophila littoralis*), where shorter circadian periods are associated  
265 with earlier diapause initiation (74), and in mustard plants (*Boechera stricta*), where shorter circadian  
266 periods are associated with delayed flowering (75). Combined with the fact that multiple interacting  
267 circadian clock genes (*per*, *Pdfr*) are implicated in photoperiodic diapause termination, patterns of circadian  
268 activity in the European corn borer moth suggest that allelic variation and interactions between *per* and  
269 *Pdfr* might affect seasonal timing by altering circadian clock function (modular pleiotropy), rather than by  
270 a direct effect on diapause that is unrelated to the circadian clock (gene pleiotropy). Further evidence for at  
271 least partial circadian control of diapause termination timing was found by Beck (76), who tested  
272 Bünning's model in the European corn borer moth using the Nanda-Hamner protocol. He found a circadian  
273 resonance cycle (~24 h peaks) between the period of the diapause inducing photoperiod and PDD time,  
274 supporting the hypothesis that diapause timing is mediated or controlled by a circadian based physiological  
275 system. Future work will be needed to understand how molecular mechanisms might directly link  
276 expression of the daily clock and the seasonal timer in this species.

277  
278 Physiological experiments suggest several molecular mechanisms by which *per* and *Pdfr* could regulate the  
279 neuroendocrine switch underlying the transition from diapause to development. Larval termination of  
280 diapause in the European corn borer moth and many other Lepidoptera is triggered by release of the  
281 developmental hormone ecdysone from the prothoracic gland (PG) due to stimulation from  
282 prothoracicotrophic hormone (PTTH) (77-79). Work in the Chinese oak silkworm (*Antheraea pernyi*)  
283 suggests that PTTH release or synthesis is regulated by the circadian clock pathway via the indolamine  
284 metabolism pathway. Specifically, a key step may involve the enzyme arylalkylamine N-acetyltransferase  
285 (*aaNAT*) and its opposing interaction on levels of melatonin (MEL) and gated PTTH synthesis/release  
286 under long-day photoperiod, or on levels of serotonin and PTTH suppression under short-day photoperiod  
287 (Figure 7) (80, 81). In *A. pernyi*, *aaNAT* is synthesized in circadian clock neurons when levels of CLK-  
288 CYC are high. PER represses CLK-CYC activity and RNAi against *per* results in increased *aaNAT*  
289 transcription, increased MEL protein, and diapause termination (81). In *D. melanogaster*, CLK-CYC binds  
290 to *Pdfr*, putatively regulating its expression (47). Activation of PDFR by PDF binding increases protein  
291 kinase A (PKA), which stabilizes PER and TIMELESS (TIM), preventing degradation, and increasing  
292 circadian period by ~2 h (52, 82). Thus, *per* and *Pdfr* alleles of the European corn borer moth may function  
293 differently under seasonal changes in photoperiod by interacting in pacemaker neurons to alter *aaNAT*  
294 production, influencing synthesis/release of PTTH and the timing of diapause termination. Some evidence  
295 of differential regulatory control of the circadian clock-indolamine pathways exist between short and long  
296 PDD populations, potentially due to changes at *per* and *Pdfr*. We previously found that transcription in  
297 adult female heads of *aaNAT*, its putative regulator (*cyc*), and its downstream target (*PTTH*) is lower in  
298 strains with longer than shorter PDD times one hour before the light-dark transition under long-day  
299 photoperiod (83). If the novel E-box element we identified in *per* from long-PDD individuals leads to  
300 increased *per* expression and repression of *cyc*, it could hypothetically lower *aaNAT*, leading to a  
301 perception of days as shorter and delaying diapause termination. In addition to interaction of *per* and *Pdfr*  
302 in pacemaker neurons, a second route for epistasis and control of termination could occur by the release of

303 ecdysone through an independent *Pdfr* cascade in the PG discovered in the silkworm *Bombyx mori* (Figure  
304 7) (84). Indeed, knockdowns of *Pdfr* are sufficient to induce diapause under long photoperiods in mosquitos  
305 (*Culex pipiens*) and ablation of PDF-positive neurons impairs the photoperiodic regulation of diapause in  
306 bean bugs (*Riptortus pedestris*) and blow flies (*Protophormia terraenovae*) (63,85,86).

307  
308 Despite repeated observation of geographic variation in circannual rhythm within and among species, and  
309 widespread alterations of seasonal activity in response to climate change and range expansion (3, 15, 20,  
310 30, 87), seasonal timing in nature has rarely been linked to causal mechanisms. This gap in knowledge is  
311 alarming given that recent work suggests that roughly half of Lepidopteran species may be currently in  
312 decline (88) and accumulating connections between seasonal timing flexibility and population persistence  
313 (89). Establishing the genomic determinants of circannual variation is essential for understanding the  
314 capacity of species to tolerate rapidly changing environments (encountered through species movement or  
315 changes in local climate), as well as to accurately predict their future evolutionary trajectories (across  
316 geographic space and through time) (10, 13). We have shown using multiple whole-genome approaches in  
317 the European corn borer that evolution to earlier spring termination of diapause and an associated added  
318 generation has a relatively simple genetic basis, likely involving two genes that also orchestrate circadian  
319 timekeeping. Earlier springtime activity can allow populations to track preferred seasonal environments and  
320 to produce more generations per year, both of which improves population tolerance of sustained  
321 environmental change in theoretical (10) and empirical studies (87, 89). The duration of insect diapause  
322 generally tracks winter length, which will decrease by a month or more over the next century according to  
323 most climate change models (90, 91). Therefore, intense selection on alleles at *per* and *Pdfr* in this species  
324 is likely to be an important component of continued adaptation, anticipated range expansion (92, 93), and  
325 long-term species persistence under rapidly changing seasonal environments. As a major pest of corn and  
326 other crops in North America and Europe, the ecological and economic ramifications of these  
327 microevolutionary changes will be significant. To understand why certain pests like *Ostrinia* moths have  
328 the capacity to become greater threats under projected climates and why certain beneficial species may  
329 require enhanced conservation management to prevent extinction, future efforts should be made to more  
330 broadly understand the mechanisms underlying circannual rhythm in nature.

331  
332  
333

## 334 METHODS

335 **QTL mapping of termination time.** Backcross F<sub>2</sub> female offspring, F<sub>1</sub> parents and F<sub>0</sub> grandparents were  
336 genotyped for polymorphic SNPs segregating within families using multiplexed PCR amplicons (500 bp  
337 amplicons, 384 unique individual barcodes per lane) sequenced on an Illumina MiSeq at the Cornell  
338 University Sequencing Facility (primer sequences used are described in Kozak et al. (35)). Additional Z-  
339 linked and autosomal markers were genotyped using Sequenom Assays developed for polymorphic SNPs  
340 (Sequenom Assay Design Suite 1.0, Sequenom, San Diego, CA, USA) and run at the Iowa State University  
341 Center for Plant Genomics (ISU-CPG) as described in Coates et al. (94) and Levy et al. (26). Linkage maps  
342 were constructed for each family separately using a maximum recombination frequency of 0.35 and a  
343 minimum LOD of 3 in R 3.4 using rQTL and the estimate map function (95-97).

344

345 QTL mapping of PDD time was performed using the scanone and scantwo functions with standard interval  
346 mapping and an interval of 0.5 cM (similar results were obtained when using extended Haley-Knott  
347 regression) for autosomal and Z linked markers in 1 family (F6, 67 offspring) and the Z chromosome only  
348 using 5 families (F2,5,6,9,11; 226 offspring total). For 5 families, a consensus Z map was constructed from  
349 the individual Z family maps using the LPmerge package in R (root mean squared = 10.89 and standard  
350 deviation = 7.31) (98). The 95% Bayesian credible interval (BCI) for the QTL were estimated and  
351 significance of QTL determined by F-test comparisons of models with and without QTL and their  
352 interaction using fitqtl function. For estimating BCI for the epistatic QTL, mapping was repeated on 101  
353 individuals with the slow genotype at QTL1.

354

355 **Population genomic analyses.** We sampled from 5 European corn borer (ECB) populations (see Table  
356 S3). Individuals were collected from the field as diapausing larvae and PDD time was characterized in the  
357 lab. ECB have two known pheromone strains (E and Z) and field caught individuals were classified as Z  
358 strain as determined by genotyping at a polymorphic *TaqI*α restriction endonuclease cleavage site in the



359 gene responsible for differences in pheromone components, *pgfar* (99). PDD time was measured as the  
360 number of days for diapausing larva to pupate after being placed in 16:8 LD and 26°C. Fast PDD  
361 individuals pupate < 19 days after exposure to these conditions while slow PDD individuals pupate after ≥  
362 39 days (24, 25, 29). For some long PDD individuals, we only had time to eclosion data (when adults  
363 emerged from puparium). Mean time ± SD from pupation to eclosion for BV = 9.9 ± 2.9 (N=107) so we  
364 conservatively estimated PDD time by subtracting 13 days from time to eclosion. Pennsylvania individuals  
365 were collected as adults in pheromone traps (100) and this population has been consistently phenotyped as  
366 fast PDD/bivoltine over a 15-year period (101, 102).

367  
368 For each population, samples were pooled using equal DNA quantities from each individual. DNA was  
369 extracted using the Qiagen DNeasy tissue protocol except tissues were not vortexed during isolation to  
370 preserve high molecular weight DNA. Pooled libraries were prepared using the Illumina TruSeq protocol  
371 (Illumina Inc., San Diego, CA). Libraries were sequenced on an Illumina HiSeq3000 at the Iowa State  
372 University DNA Facility using 150 bp paired-end sequencing and 2 libraries run per lane. Genomic reads  
373 were trimmed using Trimmomatic v.35 to remove Illumina adapters (TruSeq2 single-end or TruSeq3  
374 paired-end), reads with a phred quality score ( $q$ ) < 15 over a sliding window of 4 and reads < 36 bp long.  
375 Trimmed genomic data were aligned to the 454.7 Mb draft ECB genome (GenBank BioProject  
376 PRJNA534504; BioSample SAMN11491597; accession SWFO00000000) which consists of 8,843  
377 scaffolds (N50 = 392.5 kb, largest scaffold = 3.32 Mb; BUSCO 3.0.2 (103) score = 93.1% complete from  
378 1066 from the arthropoda\_odb9 gene set (Table S2). Prior to alignment repetitive regions were masked by  
379 RepeatMasker (using *Drosophila melanogaster* TE library from repbase; <http://www.repeatmasker.org/>;  
380 accessed March 2017; (104)). Genomic scaffold chromosomal location was determined as described in the  
381 supplemental material. Alignment was done using Bowtie2 (105). Due to poor quality of some of the  
382 reverse mate libraries, the number of reads aligned was found to be higher when reads were aligned as  
383 single-end libraries (forward mate pairs, broken mate pairs). Filtration of low quality alignments and  
384 duplicates were performed using picard tools (<http://picard.sourceforge.net>).

385  
386 Samtools was used to identify SNPs (106). Scripts from the Popoolation2 package (107,108) were used to  
387 filter SNPs (removing SNPs near small indels, and those with rare minor alleles that did not appear twice in  
388 each population), calculate allele (read count) frequency of SNPs using a minimum coverage of 14 reads  
389 and a maximum coverage of 200, calculate  $F_{ST}$  over non-overlapping 1 kb windows (with >100 bp above  
390 minimum coverage in all populations), and perform CMH tests (see Supplemental Material). We used  
391 population read counts from Popoolation to test the association of alleles among our 5 populations while  
392 controlling for population demography using BayPASS 2.1 (39) and the standard (STD) model with PDD  
393 time (slow = 1, fast = -1) and  $d_{0ij} = 6$ . Significantly associated alleles were defined as SNPs that had  $X_{iX}$   
394 above the 0.001% quantile of pseudo-observed data (POD) of simulated “neutral” loci (using  
395 simulate.bypass and mean read coverage for each population),  $BF > 20$  dB (the difference between a  
396 model with and without PDD time included; with  $BF = 20$  indicating “decisive” evidence in support of an  
397 association; (109)) and  $eBPis > 2$  (which estimates how likely it is that the posterior distribution of  $\beta$   
398 includes zero; equivalent to  $P < 0.01$ ) (39, 40, 110). BayPASS was run separately for Z chromosome  
399 (14,724 SNPs; haploid pool sizes: EA = 50, GEN = 38, LA = 78, PY = 37, BV = 34) and autosomal loci (N  
400 = 577,412 SNPs; EA = 68, GEN = 50, LA = 78, PY = 52, BV = 40).

401  
402 **Individual resequencing.** To identify the specific polymorphisms associated with voltinism differences  
403 and calculate LD, individual re-sequencing was done for 18 slow PDD individuals (10 GEN, 4 BV, 4 PY),  
404 25 fast PDD individuals (14 EA, 11 LA). Individual libraries were prepared using the Illumina TruSeq  
405 protocol and were sequenced on an Illumina NextSeq using 150 bp paired-end sequencing at Cornell  
406 University. Trimmed genomic data were analyzed using the GATK best practices pipeline (111-113). Data  
407 were aligned to the draft reference ECB genome using BWA (106). Aligned reads were sorted and filtered  
408 using picard and samtools to remove duplicates and reads with a mapping quality score (Q) below 20.  
409 SNPs and small indels (< 50 bp indels) were called using GATK Haplotype caller (run in joint genotyping  
410 mode) after realigning around indels. Variants were filtered using recommended GATK hard filters (113).  
411 Larger structural variants (indels > 300 bp and inversions) were called from individual aligned bam files  
412 using information from split paired end reads in Delly2 (114).  
413

414 **Linkage disequilibrium.** LD was calculated after the phase of genotypes was imputed using Beagle 5.0  
415 (115). Prior to LD calculation, phased genotypes were filtered to include only those located within genes  
416 and  $MAF \geq 0.25$  and inter-scaffold  $r^2$  was calculated in vcftools (116). We summarized  $r^2$  over genes and  
417 performed bootstrapping analyses in R using data.table, plyr, and boot packages (117-119). Plots were  
418 constructed using the ggplot2 and qqman packages (120-121).  
419

420 We ran an association analysis on sequencing data from individual ECB samples. GATK allele calls for  
421 SNPs and small indels (< 50 bp) were combined with delly2 variant calls of large indels and inversions  
422 using the combine variants function in GATK. We then analyzed the association of these polymorphisms  
423 with PDD time in plink 1.9 (48) with PDD time coded as a binary case/control phenotype (1 = fast, 2 =  
424 slow) and using a Fisher's exact test to detect significant differences in allele frequencies. P-values were  
425 FDR corrected genome-wide using the fdrttools package in R (122).  
426

427  
428 **Circadian activity.** To measure the endogenous circadian clock, we used laboratory colonies from BV  
429 (slow-PDD) and a colony from a fast-PDD population collected near Geneva NY raised in the lab at 16:8  
430 and 26°C (25, 28, 34, 35, 38). After pupation, male pupae were transferred to tubes within activity monitors  
431 in free running conditions (total darkness; DD) at 26°C. Activity was measured using a Trikinetics activity  
432 monitor (model LAM25, Waltham, MA) from the first day of adult eclosion. 16 individuals of each type  
433 were measured in two replicates for a total of 32 individuals per PDD type. Data were analyzed using  
434 custom MATLAB toolboxes (123).  
435

#### 436 437 **ACKNOWLEDGEMENTS**

438 Gabriel Golezer and Erastus Thuo assisted with DNA isolations. Henry Kunerth and Ben Hamilton assisted  
439 with sample acquisition. We thank F. Rob Jackson, Mary Roberts, and Jasper and Rigel Hatch Dopman for  
440 help conducting circadian activity experiments. This research was funded by the National Science  
441 Foundation (DEB-1257251 to E.B.D.; DEB-1256688 to R.G.H), Tufts University, a Tufts University  
442 Faculty Research Award (E.B.D.), and cooperative agreement 58-5030-7-066 between the United States  
443 Department of Agriculture, Agricultural Research Service (USDA-ARS), and Tufts University. Funding  
444 was also received from USDA-ARS Project CRIS-5030-22000-018-00D, USDA-ARS: Project CRIS-3625-  
445 22000-017-00 and the Iowa Agriculture and Home Economics Experiment Station, Ames, IA Project 3543.  
446 This article reports the results of research only and any mention of products or services does not constitute  
447 an endorsement by USDA-ARS. USDA-ARS is an equal opportunity employer and provider. While  
448 performing this research, S.C.K. was partially funded by the Tufts University Summer Scholars program  
449 and C.B.W. by a National Science Foundation Graduate Research Fellowship (2011-116050).  
450

#### 451 **Author contributions:**

452 G.M.K. and E.B.D. designed and performed research, analyzed data, and wrote the paper. B.S.C.  
453 contributed population genomic and genome sequencing. C.B.W. and S.C.K. performed primer design,  
454 DNA isolation, PDD phenotyping. S.M.B. performed primer design, amplicon and individual resequencing  
455 library preparation. R.G.H. assisted with research design.

#### **Data deposition:**

Genbank (sequencing data):

ECB Genome: BioProject PRJNA534504; BioSample SAMN11491597; accession SWFO00000000  
Pool-seq: BioProject PRJNA540655 (BV,Gen,EA,PY); BioProject PRJNA361472 (LA: SRX249882)  
Indiv-seq: BioProject PRJNA540833

## REFERENCES

1. Danks HV Insect dormancy: an ecological perspective (Biological Survey of Canada, Ottawa). (1987).
2. Chuine I (2010) Why does phenology drive species distribution? *Philos Trans Roy Soc B* 365:3149–3160.
3. Walther GR, et al. (2002) Ecological responses to recent climate change. *Nature* 416:389–395.
4. Bradshaw WE, Holzapfel CM (2008) Genetic response to rapid climate change: it's seasonal timing that matters. *Mol Ecol* 17:157–166.
5. Willis CG, Ruhfel B, Primack RB, Miller-Rushing AJ, Davis CC (2008) Phylogenetic patterns of species loss in Thoreau's woods are driven by climate change. *Proc Natl Acad Sci USA* 105:17029–17033.
6. Møller AP, Rubolini D, Lehikoinen E (2008) Populations of migratory bird species that did not show a phenological response to climate change are declining. *Proc Natl Acad Sci USA* 105: 16195–16200.
7. Roff DA (1980) Optimizing developmental time in a seasonal environment: The “ups and downs” of clinal variation. *Oecologia* 45:202–208.
8. Roff DA (1983) Phenological adaptation in a seasonal environment: a theoretical perspective. *Diapause and Life Cycle Strategies in Insects* (Junk, The Hague ), pp 253–270.
9. Stearns SC (1992) *The evolution of life histories* (Oxford University Press).
10. Chevin L-M, Lande R, Mace GM (2010) Adaptation, Plasticity, and Extinction in a Changing Environment: Towards a Predictive Theory. *PLoS Biol* 8:e1000357.
11. Helm B, et al. (2013) Annual rhythms that underlie phenology: biological time-keeping meets environmental change. *Proc R Soc Lond B Biol Sci* 280:20130016.
12. Van Dyck H, Bonte D, Puls R, Gotthard K, Maes D (2014) The lost generation hypothesis: could climate change drive ectotherms into a developmental trap? *Oikos* 124(1):54–61.
13. Hoffmann AA, Sgrò CM (2012) Climate change and evolutionary adaptation. *Nature* 470:479–485.
14. Visser ME, Caro SP, Van Oers K, Schaper SV, Helm B (2010) Phenology, seasonal timing and circannual rhythms: towards a unified framework. *Philos Trans Roy Soc B* 365:3113–3127.
15. Denlinger DL, Hahn DA, Merlin C, Holzapfel CM, Bradshaw WE (2017) Keeping time without a spine: what can the insect clock teach us about seasonal adaptation? *Philos Trans Roy Soc B* 372:20160257–9.
16. Saunders DS (1980) Some effects of constant temperature and photoperiod on the diapause response of the flesh fly, *Sarcophaga argyrostoma*. *Physiol Entomol* 5:191–198.
17. Tauber MJ, Tauber CA, Masaki S (1986) *Seasonal Adaptations of Insects* (Oxford University Press).
18. Košťál V (2006) Eco-physiological phases of insect diapause. *J Insect Physiol* 52:113–127.
19. Bradshaw WE, Holzapfel CM (2010) Light, Time, and the Physiology of Biotic Response to Rapid Climate Change in Animals. *Annu Rev Physiol* 72:147–166.
20. Danilevsky AS, Goryshin NI, Tyshchenko VP (1970) Biological rhythms in terrestrial arthropods. *Annu Rev Entomol* 15:201–244.
21. Caffrey DJ, Worthley LH (1927) Progress report on the investigations of the European corn borer. Series: Department bulletin (United States. Dept. of Agriculture); no. 1476.
22. Showers WB (1979) Effect of diapause on the migration of the European corn borer into the southeastern United States. In: Movement of highly mobile insects: concepts and methodology in research; proceedings of a conference (Raleigh, NC, University Graphics, 1979).
23. Derron JO, Goy G, Breitenmoser S (2009) Biological characterisation of the bivoltine race of the European corn borer (*Ostrinia nubilalis*) in the Lake Geneva region. *Revue Suisse d'Agriculture* 41:179–184.
24. Glover TJ, Knodel JJ, Robbins PS, Eckenrode CJ, Roelofs WL (1991) Gene Flow Among Three Races of European Corn Borers (Lepidoptera: Pyralidae) in New York State. *Environ Entomol* 20:1356–62.
25. Dopman EB, Perez L, Bogdanowicz SM, Harrison RG (2005) Consequences of reproductive barriers for genealogical discordance in the European corn borer. *Proc Natl Acad Sci USA* 102:14706–14711.
26. Levy RC, Kozak GM, Wadsworth CB, Coates BS, Dopman EB (2015) Explaining the sawtooth: latitudinal periodicity in a circadian gene correlates with shifts in generation number. *J Evol Biol* 28:40–53.
27. Istock CA (1981) Natural selection and life history variation: theory plus lessons from a mosquito. *Insect Life History Patterns* (Springer), pp 113–127.
28. Wadsworth CB, Woods WA Jr, Hahn DA, Dopman EB (2013) One phase of the dormancy developmental pathway is critical for the evolution of insect seasonality. *J Evol Biol* 26:2359–2368.
29. Dopman EB, Robbins PS, Seaman A (2010) Components of reproductive isolation between North American pheromone strains of the European corn borer. *Evolution* 64:881–902.
30. Altermatt F (2010) Climatic warming increases voltinism in European butterflies and moths. *Proc R Soc Lond B Biol Sci* 277:1281–1287.
31. McLeod DGR (1978) Genetics of diapause induction and termination in the European corn borer, *Ostrinia nubilalis* (Lepidoptera: Pyralidae), in Southwestern Ontario. *Can Entomol* 110:1351–1353.
32. Glover TJ, Robbins PS, Eckenrode CJ, Roelofs WL (1992) Genetic control of voltinism characteristics in European corn borer races assessed with a marker gene. *Arch Insect Biochem Physiol* 20:107–117.
33. Wadsworth CB, Dopman EB (2015) Transcriptome profiling reveals mechanisms for the evolution of insect seasonality. *J Exp Biol* 218:3611–3622.

34. Wadsworth CB, Li X, Dopman EB (2015) A recombination suppressor contributes to ecological speciation in *Ostrinia* moths. *Heredity*:1–8.
35. Kozak GM, et al. (2017) A combination of sexual and ecological divergence contributes to rearrangement spread during initial stages of speciation. *Mol Ecol* 26:2331–2347.
36. McLeod DGR, Beck SD (1963) Photoperiodic termination of diapause in an insect. *Biol Bull* 124:84–96.
37. Beck SD, Alexander N (1964) Chemically and photoperiodically induced diapause development in the European corn borer, *Ostrinia nubilalis*. *Biol Bull* 126:175–184.
38. Dopman EB, Bogdanowicz SM, Harrison RG (2004) Genetic mapping of sexual isolation between E and Z pheromone strains of the European corn borer (*Ostrinia nubilalis*). *Genetics* 167:301–309.
39. Gautier M (2015) Genome-wide scan for adaptive divergence and association with population-specific covariates. *Genetics* 201(4):1555–1579.
40. Bourgeois YX, et al. (2017) A novel locus on chromosome 1 underlies the evolution of a melanic plumage polymorphism in a wild songbird. *Royal Society open science* 4:160805.
41. Reddy P, et al. (1984) Molecular analysis of the period locus in *Drosophila melanogaster* and identification of a transcript involved in biological rhythms. *Cell* 38:701–710.
42. Hyun S, et al. (2005) *Drosophila* GPCR Han is a receptor for the circadian clock neuropeptide PDF. *Neuron* 48:267–278.
43. Lear BC, et al. (2005) AG protein-coupled receptor, groom-of-PDF, is required for PDF neuron action in circadian behavior. *Neuron* 48:221–227.
44. Lindner JR, et al. (2007) The *Drosophila* Perlecan gene *trol* regulates multiple signaling pathways in different developmental contexts. *BMC Dev Biol* 7:121.
45. Wiberg RAW, Gaggiotti OE, Morrissey MB, Ritchie MG (2017) Identifying consistent allele frequency differences in studies of stratified populations. *Methods Ecol Evol* 8:1899–1909.
46. Taylor P, Hardin PE (2008) Rhythmic E-box binding by CLK-CYC controls daily cycles in *per* and *tim* transcription and chromatin modifications. *Mol Cell Biol* 28:4642–4652.
47. Meireles-Filho AC, Bardet AF, Yáñez-Cuna JO, Stampfel G, Stark A (2014) Cis-regulatory requirements for tissue-specific programs of the circadian clock. *Curr Biol* 24:1–10.
48. Chang CC, et al. (2015) Second-generation PLINK: rising to the challenge of larger and richer datasets. *Gigascience* 4:7.
49. Han B, Denlinger DL (2009) Length variation in a specific region of the period gene correlates with differences in pupal diapause incidence in the flesh fly, *Sarcophaga bullata*. *J Insect Physiol* 55:415–418.
50. Panda S, Hogenesch JB, Kay SA (2002) Circadian rhythms from flies to human. *Nature* 417:329–335.
51. Rutila JE, Edery I, Hall JC, Rosbash M (1992) The analysis of new short-period circadian rhythm mutants suggests features of *D. melanogaster* period gene function. *J Neurogenet* 8:101–113.
52. Li Y, Guo F, Shen J, Rosbash M (2014) PDF and cAMP enhance PER stability in *Drosophila* clock neurons. *Proc Natl Acad Sci USA* 111:E1284–E1290.
53. Michael TP, et al. (2003) Enhanced fitness conferred by naturally occurring variation in the circadian clock. *Science* 302:1049–1053.
54. Zheng X, Sehgal A (2008) Probing the relative importance of molecular oscillations in the circadian clock. *Genetics* 178:1147–1155.
55. Renn SC, Park JH, Rosbash M, Hall JC, Taghert PH (1999) A *pdf* neuropeptide gene mutation and ablation of PDF neurons each cause severe abnormalities of behavioral circadian rhythms in *Drosophila*. *Cell* 99:791–802.
56. Závodská R, et al. (2012) Is the sex communication of two pyralid moths, *Plodia interpunctella* and *Ephestia kuehniella*, under circadian clock regulation? *J Biol Rhythms* 27:206–216.
57. Xu G, et al. (2016) Identification and expression profiles of neuropeptides and their G protein-coupled receptors in the rice stem borer *Chilo suppressalis*. *Sci Rep* 6:28976.
58. Yoshii T, et al. (2009) The neuropeptide pigment-dispersing factor adjusts period and phase of *Drosophila*'s clock. *J Neurosci* 29:2597–2610.
59. Im SH, Li W, Taghert PH (2011) PDFR and CRY signaling converge in a subset of clock neurons to modulate the amplitude and phase of circadian behavior in *Drosophila*. *PLoS ONE* 6:e18974.
60. Schlichting M, et al. (2016) A neural network underlying circadian entrainment and photoperiodic adjustment of sleep and activity in *Drosophila*. *J Neurosci* 36:9084–9096.
61. Sawa M, Nusinow DA, Kay SA, Imaizumi T (2007) FKF1 and GIGANTEA complex formation is required for day-length measurement in *Arabidopsis*. *Science* 318:261–265.
62. Ikeno T, Numata H, Goto SG (2011) Circadian clock genes period and cycle regulate photoperiodic diapause in the bean bug *Riptortus pedestris* males. *J Insect Physiol* 57:935–938.
63. Meuti ME, Stone M, Ikeno T, Denlinger DL (2015) Functional circadian clock genes are essential for the overwintering diapause of the Northern house mosquito, *Culex pipiens*. *J Exp Biol* 218:412–422.
64. Mukai A, Goto SG (2016) The clock gene period is essential for the photoperiodic response in the jewel wasp *Nasonia vitripennis* (Hymenoptera: Pteromalidae). *Appl Entomol Zool* 51:185–194.

65. Tauber E, et al. (2007) Natural selection favors a newly derived timeless allele in *Drosophila melanogaster*. *Science* 316:1895–1898.
66. Schmidt PS, et al. (2008) An amino acid polymorphism in the couch potato gene forms the basis for climatic adaptation in *Drosophila melanogaster*. *Proc Natl Acad Sci USA* 105:16207–16211.
67. Bradshaw WE, Holzapfel CM, Mathias D (2006) Circadian rhythmicity and photoperiodism in the pitcher-plant mosquito: can the seasonal timer evolve independently of the circadian clock? *Am Nat* 167:601–605.
68. Paolucci S, Salis L, Vermeulen CJ, Beukeboom LW, Zande L (2016) QTL analysis of the photoperiodic response and clinal distribution of period alleles in *Nasonia vitripennis*. *Mol Ecol* 25:4805–4817.
69. Pruißscher P, Nylin S, Gotthard K, Wheat CW (2018) Genetic variation underlying local adaptation of diapause induction along a cline in a butterfly. *Mol Ecol* 27: 3613–3626.
70. Bunning (1936) Endogenous daily rhythms as the basis of photoperiodism. *Ber Deut Bot Ges* 54:590–607.
71. Bradshaw WE, Holzapfel CM (2010) What season is it anyway? Circadian tracking vs. photoperiodic anticipation in insects. *J Biol Rhythms* 25:155–165.
72. Emerson KJ, Bradshaw WE, Holzapfel CM (2009) Complications of complexity: integrating environmental, genetic and hormonal control of insect diapause. *Trends Genet* 25:217–225.
73. Pegoraro M, Gesto JS, Kyriacou CP, Tauber E (2014) Role for circadian clock genes in seasonal timing: testing the Bünnig hypothesis. *PLoS Genet* 10:e1004603.
74. Lankinen, P (1986) Geographical variation in circadian eclosion rhythm and photoperiodic adult diapause in *Drosophila littoralis*. *J Comp Physiol A*, 159:123–142.
75. Salmela MJ, McMinn RL, Guadagno CR, Ewers BE, Weinig C (2018) Circadian rhythms and reproductive phenology covary in a natural plant population. *J Biol Rhythms* 33:245–254.
76. Beck SD (1989) Factors influencing the intensity of larval diapause in *Ostrinia nubilalis*. *J Insect Physiol* 35:75–79.
77. Cloutier EJ, Beck SD, McLeod D, Silhacek DL (1962) Neural transplants and insect diapause. *Nature* 195:1222.
78. Gilbert LI, Bollenbacher WE, Granger NA (1980) Insect endocrinology: regulation of endocrine glands, hormone titer, and hormone metabolism. *Annu Rev Physiol* 42:493–510.
79. Gelman DB, et al. (1992) Prothoracicotropic hormone levels in brains of the European corn borer, *Ostrinia nubilalis*: diapause vs the non-diapause state. *J Insect Physiol* 38:383–395.
80. Wang Q, Mohamed AA, Takeda M (2013) Serotonin receptor B may lock the gate of PTTH release/synthesis in the Chinese silk moth, *Antheraea pernyi*; a diapause initiation/maintenance mechanism? *PLoS ONE* 8:e79381.
81. Mohamed AA, et al. (2014) N-acetyltransferase (*nat*) is a critical conjunct of photoperiodism between the circadian system and endocrine axis in *Antheraea pernyi*. *PLoS ONE* 9:e92680.
82. Seluzicki A, et al. (2014) Dual PDF signaling pathways reset clocks via TIMELESS and acutely excite target neurons to control circadian behavior. *PLoS Biol* 12:e1001810.
83. Levy RC, Kozak GM, Dopman EB (2018) Non-pleiotropic coupling of daily and seasonal temporal isolation in the European corn borer. *Genes* 9:180.
84. Iga M, Nakaoka T, Suzuki Y, Kataoka H (2014) Pigment Dispersing Factor regulates ecdysone biosynthesis via *Bombyx* neuropeptide G protein coupled receptor-B2 in the prothoracic glands of *Bombyx mori*. *PLoS ONE* 9:e103239.
85. Ikeno T, Numata H, Goto SG, Shiga S (2014) Involvement of the brain region containing pigment-dispersing factor-immunoreactive neurons in the photoperiodic response of the bean bug, *Riptortus pedestris*. *J Exp Biol* 217:453–462.
86. Shiga S, Numata H (2009) Roles of PER immunoreactive neurons in circadian rhythms and photoperiodism in the blow fly, *Protophormia terraenovae*. *J Exp Biol* 212:867–877.
87. Willis CG, et al. (2010) Favorable climate change response explains non-native species success in Thoreau's woods. *PLoS ONE* 5:e8878.
88. Sánchez-Bayo F, Wyckhuys KA (2019) Worldwide decline of the entomofauna: A review of its drivers. *Biol Conserv* 232:8–27.
89. Breed GA, Stichter S, Crone EE (2013) Climate-driven changes in northeastern US butterfly communities. *Nat Clim Chang* 3:142–145.
90. Walsh J, Wuebbles D, Hayhoe K (2014) Ch. 2: Our Changing Climate. Climate Change Impacts in the United States: The Third National Climate Assessment. US Global Change Research Program. Melillo JM, Richmond T, Yohe G, eds.
91. Williams CM, Henry HA, Sinclair BJ (2015) Cold truths: how winter drives responses of terrestrial organisms to climate change. *Biol Rev* 90:214–235.
92. Diffenbaugh NS, Krupke CH, White MA, Alexander CE (2008) Global warming presents new challenges for maize pest management. *Environ Res Lett* 3:044007.
93. Svobodová E, et al. (2014) Determination of areas with the most significant shift in persistence of pests in Europe under climate change. *Pest Manag Sci* 70:708–715.

94. Coates BS, et al. (2011) The application and performance of single nucleotide polymorphism markers for population genetic analyses of Lepidoptera. *Front Genet* 2: doi:10.3389/fgene.2011.00038.
95. Broman KW, Wu H, Sen S, Churchill GA (2003) R/qtl: QTL mapping in experimental crosses. *Bioinformatics* 19:889–890.
96. Broman KW, Sen S (2009) *A Guide to QTL Mapping with R/qtl* (Springer).
97. R Core Team (2018). R: A language and environment for statistical computing. R Foundation for Statistical Computing, Vienna, Austria. URL <https://www.R-project.org/>.
98. Endelman JB, Plomion C (2014) LPmerge: an R package for merging genetic maps by linear programming. *Bioinformatics* 30:1623–1624.
99. Coates BS, et al. (2013) Frequency of hybridization between *Ostrinia nubilalis* E- and Z-pheromone races in regions of sympatry within the United States. *Ecol Evol* 3:2459–2470.
100. Coates BS, et al. (in review) Influence of host plant, geography and pheromone strain on genomic differentiation in sympatric populations of *Ostrinia nubilalis*. *Mol Ecol*.
101. Calvin DD, Song PZ (1994) Variability in postdiapause development periods of geographically separate *Ostrinia nubilalis* (Lepidoptera: Pyralidae) populations in Pennsylvania. *Environ Entomol* 23:431–436.
102. uz Zaman MF (2008) A comparison of univoltine and multivoltine European corn borer (*Ostrinia nubilalis* Hübner): Life history characters, Bt toxin susceptibility, parasitoid impact, and population pattern. PhD thesis: Penn State University.
103. Waterhouse RM, et al. (2017) BUSCO applications from quality assessments to gene prediction and phylogenomics. *Mol Biol Evol* 35:543–548.
104. Smit AFA, Hubley R & Green P. *RepeatMasker Open-4.0*. 2013-2015 <<http://www.repeatmasker.org>
105. Ben Langmead, Salzberg SL (2012) Fast gapped-read alignment with Bowtie 2. *Nature Methods* 9:357–359.
106. Li H, et al. (2009) The sequence alignment/map format and SAMtools. *Bioinformatics* 25:2078–2079.
107. Kofler R, et al. (2011) PoPoolation: A Toolbox for Population Genetic Analysis of Next Generation Sequencing Data from Pooled Individuals. *PLoS ONE* 6:e15925.
108. Kofler R, Pandey RV, Schlotterer C (2011) PoPoolation2: identifying differentiation between populations using sequencing of pooled DNA samples (Pool-Seq). *Bioinformatics* 27(3):3435–3436.
109. Jeffreys H (1961) *Theory of Probability* (Clarendon Press, Oxford). 3rd Ed.
110. Vitalis R, Gautier M, Dawson KJ, Beaumont MA (2014) Detecting and measuring selection from gene frequency data. *Genetics* 196:799–817.
111. McKenna A, et al. (2010) The Genome Analysis Toolkit: a MapReduce framework for analyzing next-generation DNA sequencing data. *Genome Res* 20:1297–1303.
112. DePristo MA, et al. (2011) A framework for variation discovery and genotyping using next-generation DNA sequencing data. *Nature Genet* 43:491.
113. Van der Auwera GA, et al. (2013) From FastQ data to high-confidence variant calls: the genome analysis toolkit best practices pipeline. *Curr Protoc Bioinformatics*:11–10.
114. Rausch T, et al. (2012) DELLY: structural variant discovery by integrated paired-end and split-read analysis. *Bioinformatics* 28:i333–i339.
115. Browning BL, Zhou Y, Browning SR (2018) A One-Penny Imputed Genome from Next-Generation Reference Panels. *Am J Hum Genet* 103:338–348.
116. Danecek, Petr, et al (2011) The variant call format and VCFtools. *Bioinformatics* 27: 2156-2158.
117. Dowlle M, Srinivasan A (2018). data.table: Extension of “data.frame”. R package version 1.11.8. <https://CRAN.R-project.org/package=data.table>
118. Wickham H (2011) The Split-Apply-Combine Strategy for Data Analysis. *J Stat Softw* 40:1-29.
119. Canty A, Ripley B (2017) boot: Bootstrap R (S-Plus) Functions. R package version 1.3-20.
120. Wickham, H (2017) ggplot2: Elegant Graphics for Data Analysis. Springer-Verlag New York, 2016.
121. Turner, S (2017) qqman: Q-Q and Manhattan Plots for GWAS Data. R package version 0.1.4. <https://CRAN.R-project.org/package=qqman>
122. Strimmer K (2008) fdrtool: a versatile R package for estimating local and tail area-based false discovery rates. *Bioinformatics* 24:1461-1462.
123. Levine JD, Funes P, Dowse HB, Hall JC (2002) Signal analysis of behavioral and molecular cycles. *BMC Neurosci* 3:1.
124. Ko HW, et al. (2010) A hierarchical phosphorylation cascade that regulates the timing of PERIOD nuclear entry reveals novel roles for proline-directed kinases and GSK-3 $\beta$ /SGG in circadian clocks. *J Neurosci* 30:12664–12675.
125. Zhan S, Merlin C, Boore JL, Reppert SM (2011) The monarch butterfly genome yields insights into long-distance migration. *Cell* 147:1171–1185.

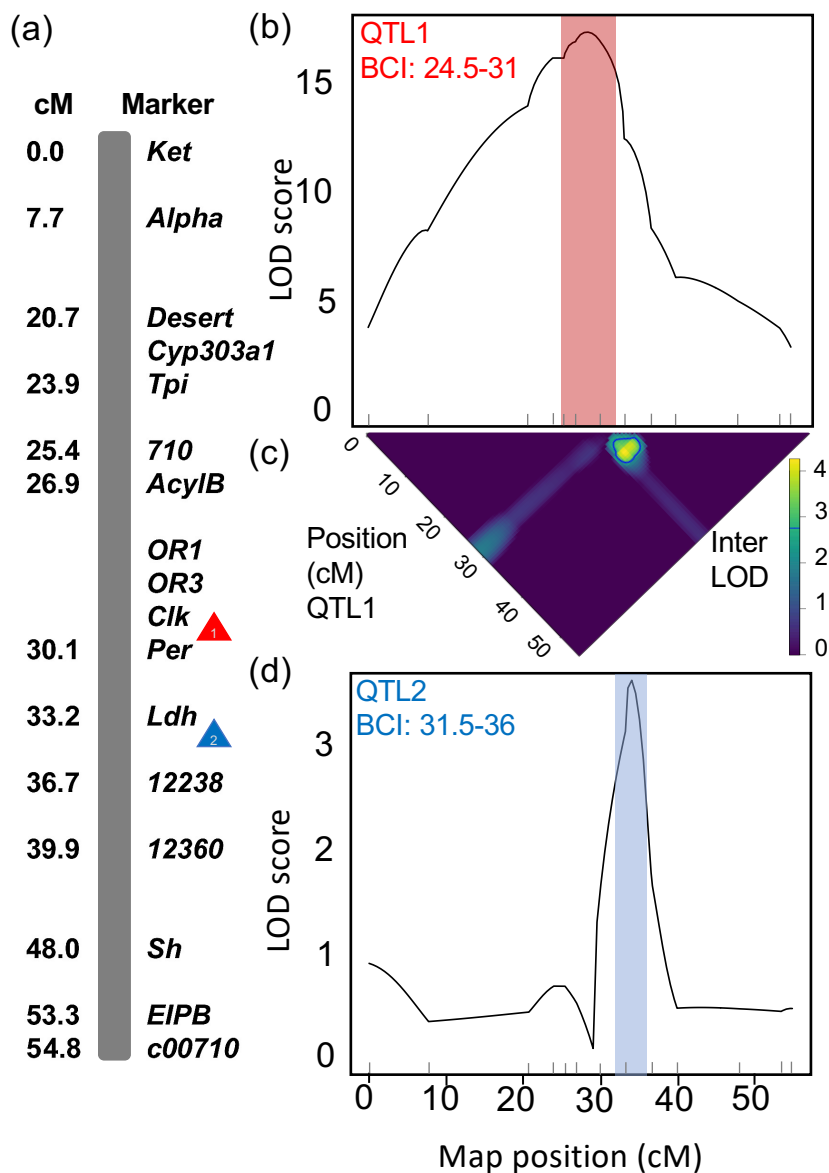

**Figure 1. QTL for PDD time on the Z chromosome.** a) Z chromosome consensus linkage map, adapted from Kozak et al. (2017) (35); b) plot of QTL1 estimated using scanone, with Bayesian credible interval (BCI) shaded; c) plot of the LOD score for a model with an epistatic interaction compared to a model including only a single QTL, blue line indicates the 1.5 LOD interval contour and the location of QTL2; d) plot of QTL2 estimated using scanone on individuals with slow allele at QTL1 (BCI shaded). N = 226 offspring for a-c; N = 101 for d.

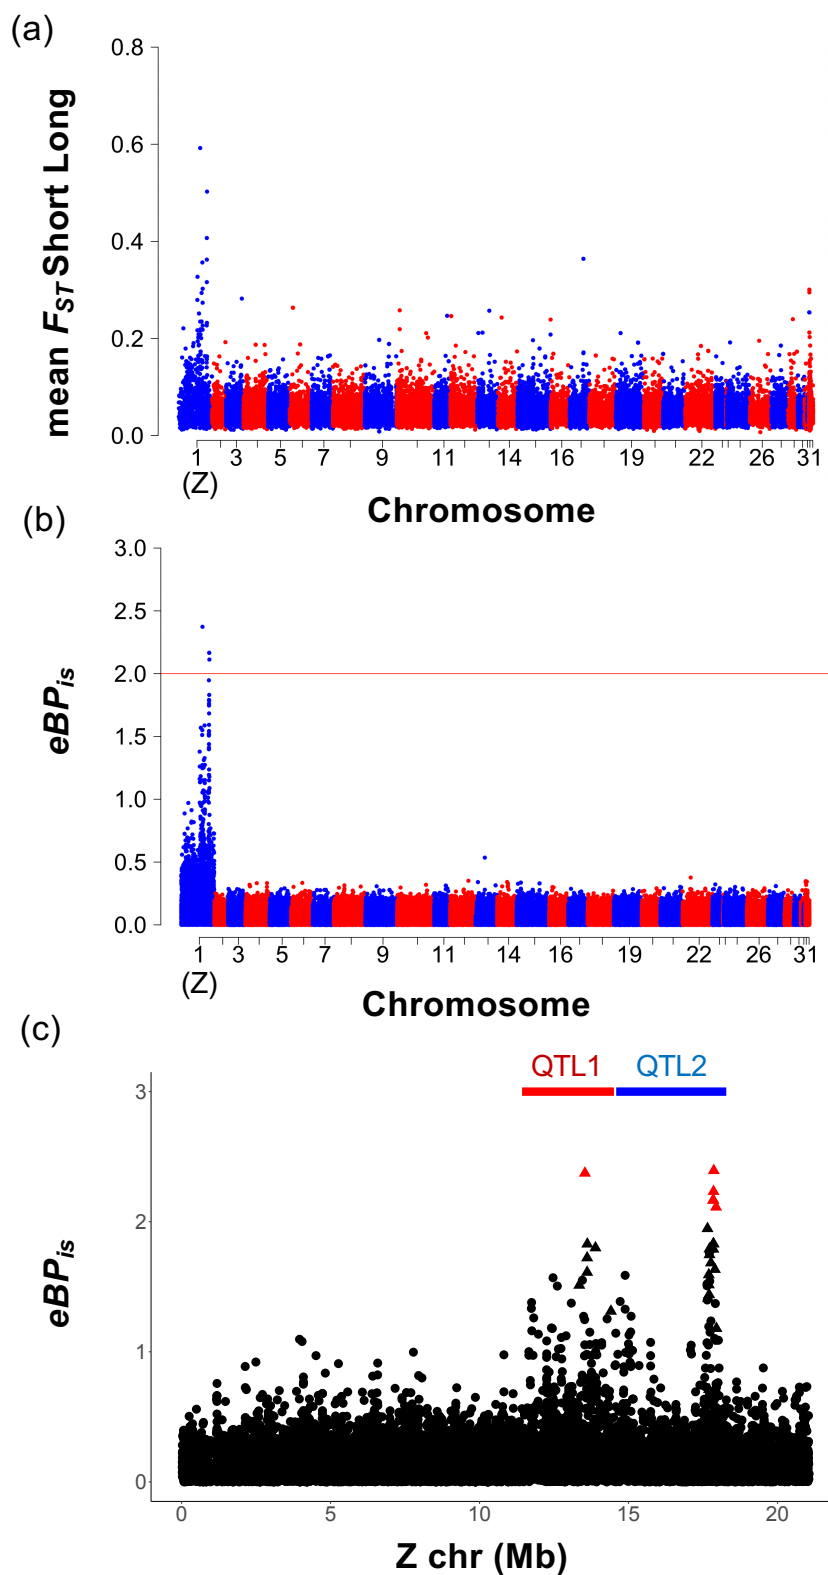

**Figure 2. SNP association with PDD time in natural populations.** a) Genome-wide plot of mean  $F_{ST}$  between short and long populations gene regions for chromosomes 1(Z)-31, with unscaffolded chromosomes assigned to chromosome 32; N = 57,842 1 kb windows. (b) Genome-wide plot of BayPASS empirical Bayesian P-values ( $eBP_{is}$ ) for PDD association (N = 293,590 SNPs in CDS);  $eBP_{is} > 2$  (equivalent to  $P < 0.01$ ) indicated by red line. (c) Plot across the Z chromosome. SNPs with strongest evidence of association denoted by triangles (Bayes Factor  $> 20$  dB) and labeled in red ( $eBP_{is} > 2$ ); no evidence denoted by black circles (BF  $< 20$  dB); location of QTL1 and QTL2 BCI shown; N = 8,435 SNPs within genes.



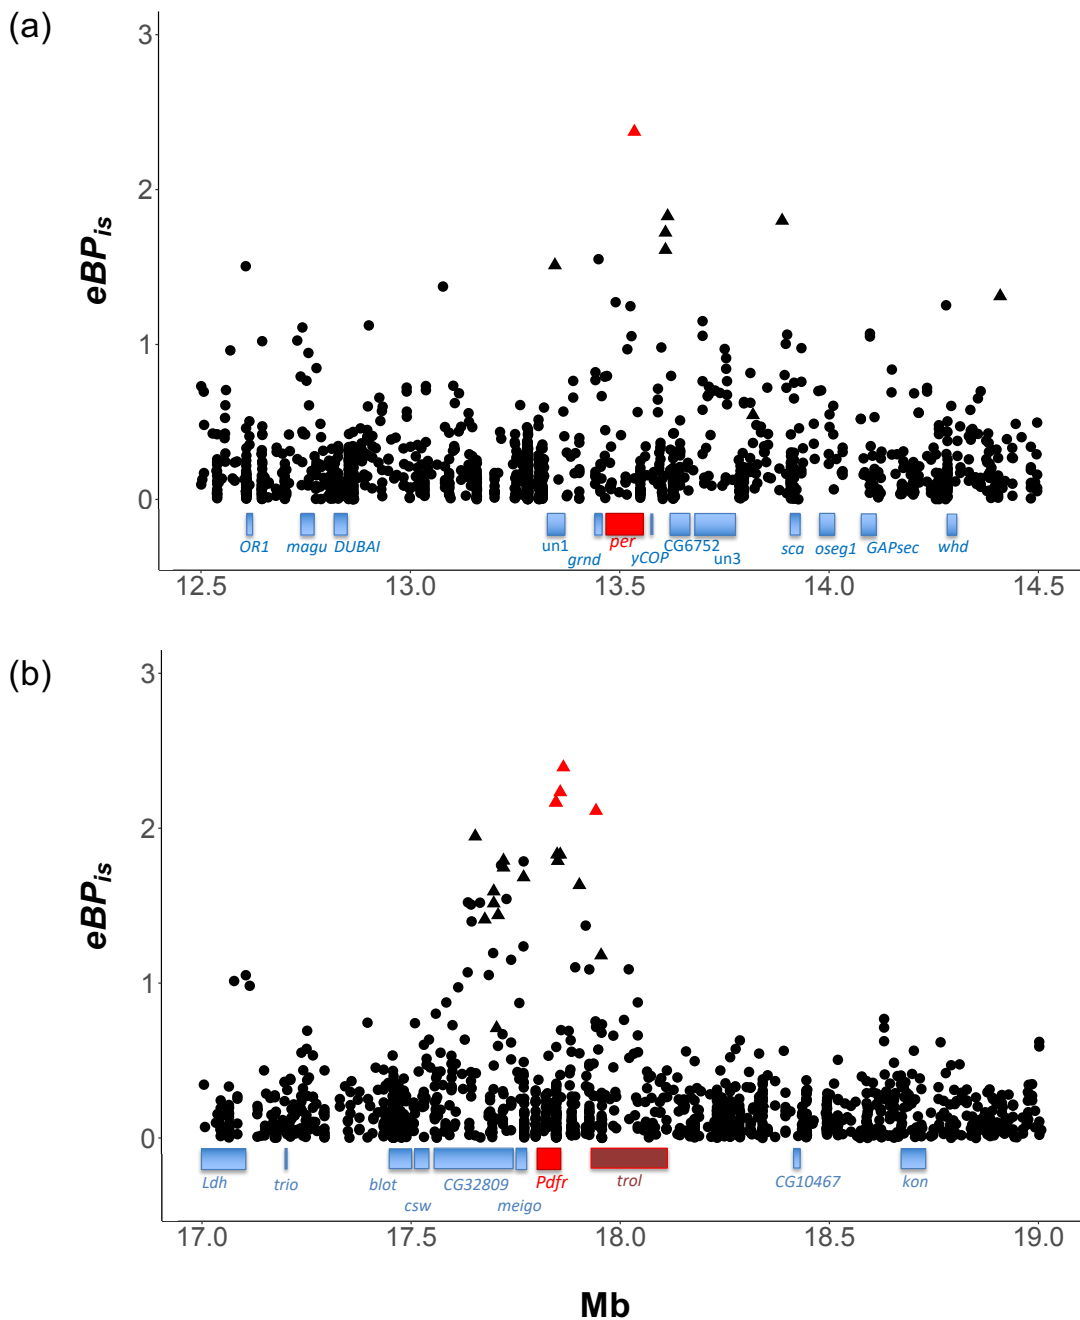

**Figure 3. Gene locations relative to peak association with PDD time.** a)  $eBP_{is}$  plotted for 2 Mb interval around *per*, showing *per* (red) location and other flanking gene intervals (blue); entire region is within QTL1 BCI. Intergenic SNPs included (N=1,441). b)  $eBP_{is}$  plotted for 2 Mb interval around *Pdfr* (bright red) location, *trol* (dark red) and other gene intervals (blue); all within QTL2 BCI except *kon* and CG10467 (N=1,423 SNPs).  $eBP_{is} > 2$  labeled in red. BF > 20 dB denoted by triangles. Full gene descriptions listed in Table S5.

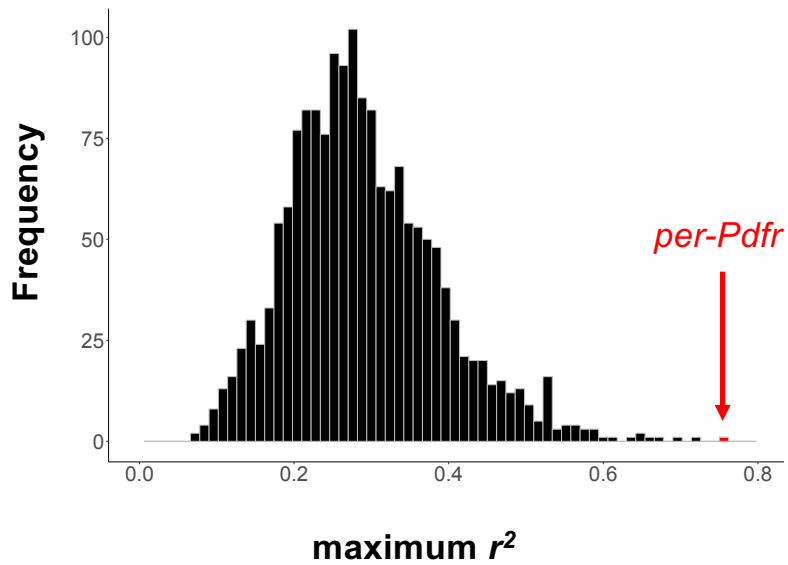

**Figure 4. Linkage disequilibrium among genes in QTL1 and QTL2.** Histogram of maximum linkage disequilibrium (LD, measured by  $r^2$ ). Red bar indicates *per-Pdfr*, the genes with the maximum LD observed for any genes in the two intervals over 1 Mb apart (N = 1,678 pairs).

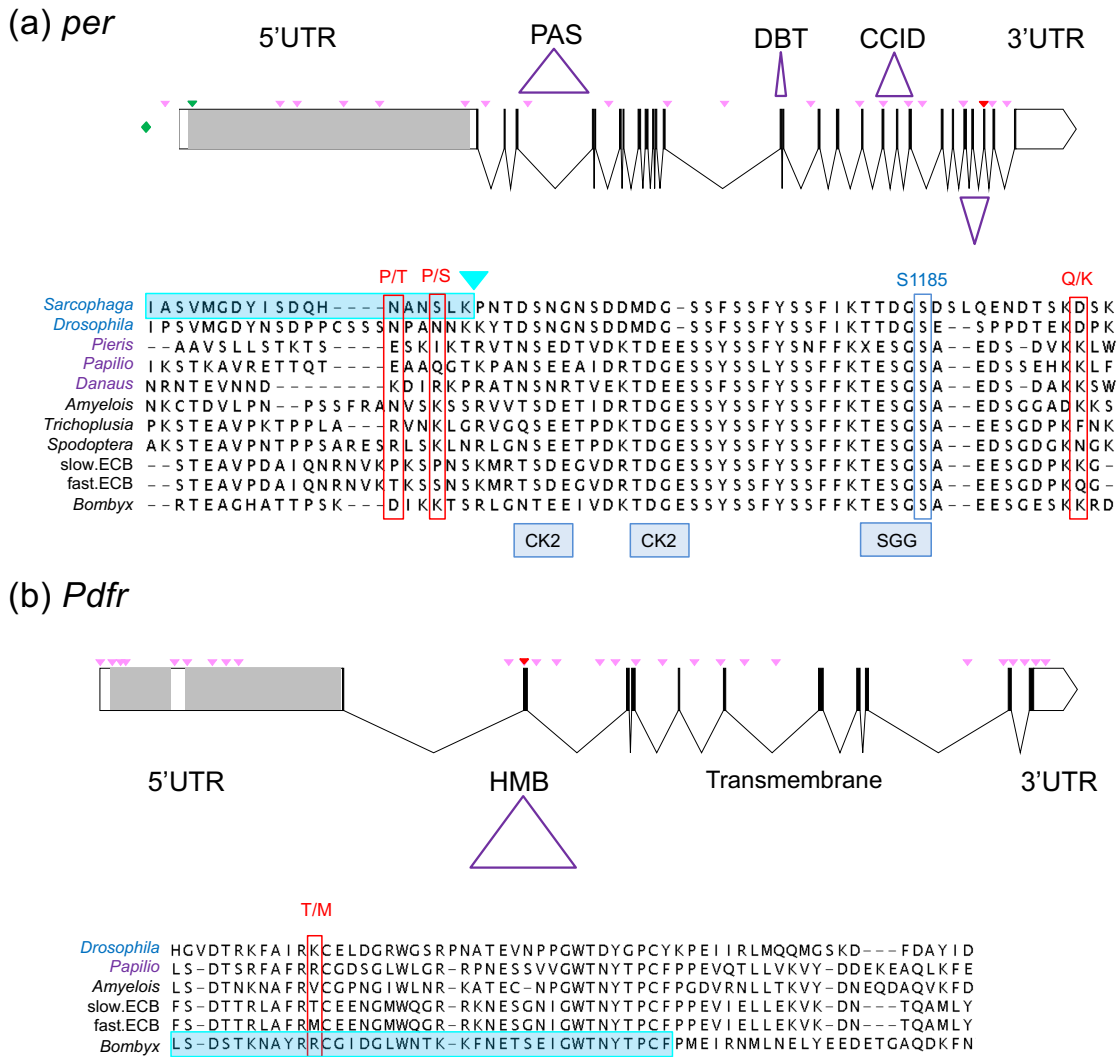

**Figure 5. Gene models for candidate PDD time genes and amino acid changes.** Candidate gene models including 5' UTR, 3' UTR, exons (black bars), with protein domains (purple triangles) labeled. Gray portions of 5'UTR are putative 5'UTR introns (i.e., sequences not present in RNA transcripts). Locations of polymorphisms that showed significant association ( $q < 0.01$ ) in individual sequencing data indicated by light pink triangles, those that change amino acid sequence denoted by red triangles. Below, amino acid sequence for exons with differences in sequence between ECB short- and long-PDD populations aligned with selected species of flies (blue), butterflies (purple) and moths (black). a) Gene model for *per* in ECB, including the upstream E-box enhancer element (green diamond) and novel E-box in 5'UTR (green triangle). Domains for TIMELESS binding (PAS), DOUBLETIME binding (DBT) and CLOCK-CYCLE inhibitory domain (CCID) indicated. Two amino acid changes (outlined in red) are in the same region which *Sarcophaga* high diapausing mutants have a deletion (shaded in teal) and non-diapausing mutants have an insertion (teal triangle; (49)). The amino acid changes also flank a region containing several predicted casein kinase 2 (CK2) sites in ECB and a conserved serine phosphorylated by SHAGGY identified in *Drosophila* (outlined in blue; (125)); N=78 polymorphisms. b) Gene model for *Pdfr* including PDF hormone binding domain (HMB), and transmembrane domain (7 alpha helices). Amino acid sequence shown for portion of the PDF hormone binding domain region annotated in *Bombyx mori* (outlined in teal) with differences between ECB slow and fast populations outlined in red; N = 166 polymorphisms.

(a) Short

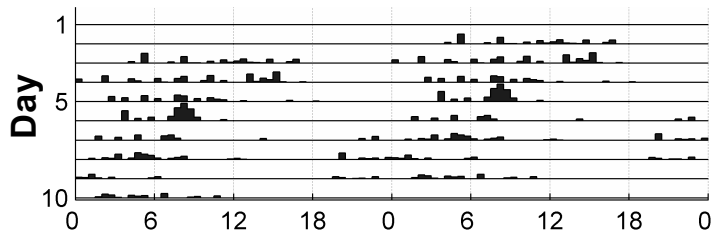

(b) Long

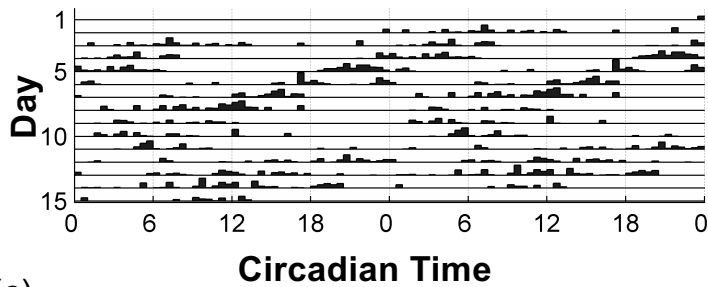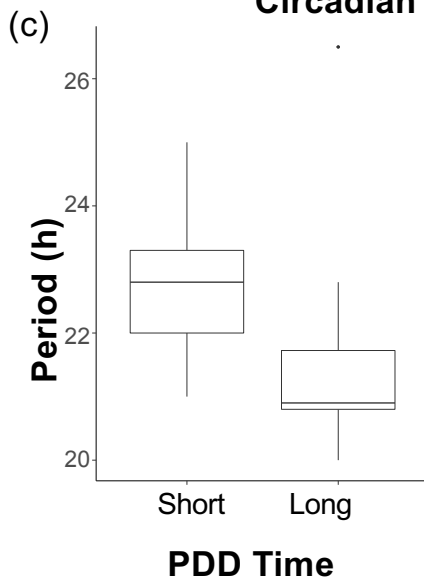

**Figure 6. Circadian period for short- and long-PDD insects.** Actograms showing the locomotor activity in complete darkness (DD) over 2 day windows (double-plotted) for up to 15 days used to estimate circadian period ( $\tau$ ) for a representative a) short-PDD male, b) long-PDD male. c) Boxplot of length of circadian period (in hours) for males with short and long PDD (median, first and third quartile shown), lines indicate 95% confidence interval. Long-PDD individuals have a significantly shorter period ( $P < 0.001$ );  $N = 46$  adults.

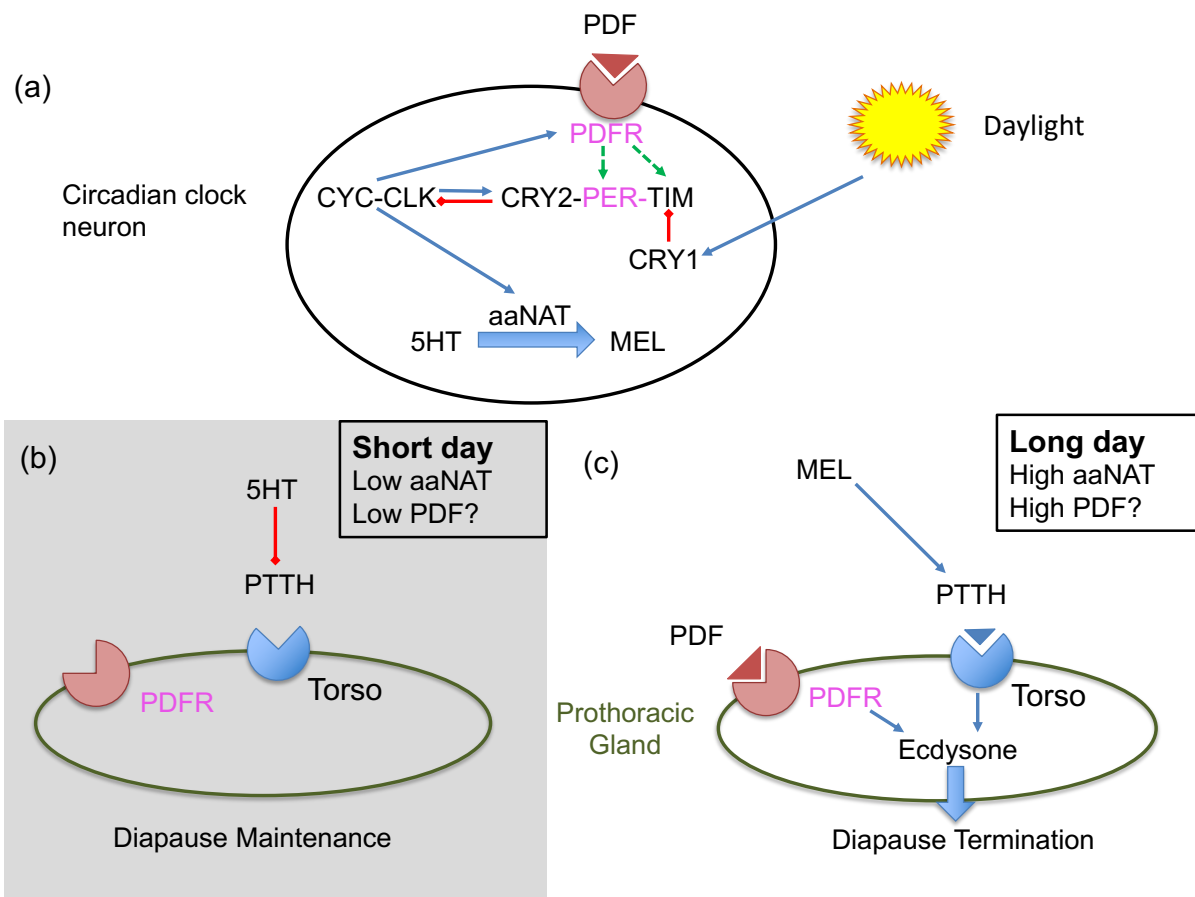

**Figure 7. Hypothesized pathway for circadian clock involvement in diapause termination.**

a) Regulation of circadian clock genes in clock pacemaker neurons shown (adapted from Lepidopteran clock in (125)). Blue arrows indicate activation, red arrows are suppression, black dashes are heterodimer formation, green dashed arrows are stabilization. Candidate genes shown in pink. The heterodimer formed by Clock (CLK) and Cycle (CYC) upregulate Period (PER), Timeless (TIM), and Pigment dispersing factor receptor (PDFR) (47). When PER and TIM are bound to Cryptochrome2 (CRY2), they migrate into the nucleus and PER-CRY2 repress CLK-CYC (126). Cryptochrome1 (CRY1) degrades TIM in the presence of light. The neurotransmitter pigment dispersing factor (PDF) binds to its receptor (PDFR) and this activation stabilizes both TIM (82) and PER (52). CLK-CYC activates arylalkylamine N-acetyltransferase (aaNAT) which converts Serotonin (5HT) to Melatonin (MEL) (81). b) Under short day conditions, serotonin levels are high, preventing PTTH release and leading to diapause maintenance. c) Under long days, melatonin levels are high and PTTH is released, leading to activation of ecdysone release by the PG and diapause termination. Ecdysone release is also facilitated by activation of PDFR in the PG (84).

**A. BayPASS outliers (pool-seq)**

| Mb    | Gene        | Scaffold    | BP     | $XtX$ | pearson $r$ | $\beta$ | BF( $dB$ ) | $eBP_{is}$ | QTL  | Location | Max LD (>1 Mb) | Gene Max LD |
|-------|-------------|-------------|--------|-------|-------------|---------|------------|------------|------|----------|----------------|-------------|
| 13.55 | <i>per</i>  | scaffold532 | 93691  | 14.96 | 0.74        | 0.07    | 31.56      | 2.37       | QTL1 | 5'UTR    | 0.609          | <i>Pdfr</i> |
| 17.80 | <i>Pdfr</i> | scaffold87  | 80256  | 16.39 | 0.65        | 0.063   | 45.19      | 2.17       | QTL2 | 5'UTR    | 0.734          | <i>per</i>  |
| 17.80 | <i>Pdfr</i> | scaffold87  | 80277  | 17.30 | 0.65        | 0.067   | 36.95      | 2.17       | QTL2 | 5'UTR    | 0.734          | <i>per</i>  |
| 17.94 | <i>trol</i> | scaffold87  | 176004 | 14.41 | 0.67        | 0.062   | 29.31      | 2.11       | QTL2 | 3'UTR    | 0.526          | <i>Atg9</i> |

**B. Ebox altering outliers**

| Mb     | Gene       | SNP         | BP    | Location | minor allele | short PDD MAF | long PDD MAF | $P$      | fdr q    | short PDD | long PDD |
|--------|------------|-------------|-------|----------|--------------|---------------|--------------|----------|----------|-----------|----------|
| 13.551 | <i>per</i> | scaffold532 | 78628 | 5UTR     | G            | 0             | 0.56         | 4.00E-10 | 1.01E-05 | CACGTC    | CACGTG   |

**C. Nonsynonymous outliers in *per* and *Pdfr* (indiv-seq)**

| Mb        | Gene        | SNP         | BP     | Location | minor allele | short PDD MAF | long PDD MAF | $P$      | fdr q    | short PDD AA | long PDD AA |
|-----------|-------------|-------------|--------|----------|--------------|---------------|--------------|----------|----------|--------------|-------------|
| 13.488935 | <i>per</i>  | scaffold532 | 140360 | Exon23   | C            | 0.2           | 0.74         | 1.33E-06 | 0.0063   | P            | T           |
| 13.488926 | <i>per</i>  | scaffold532 | 140369 | Exon23   | C            | 0.2           | 0.74         | 1.33E-06 | 0.0063   | S            | P           |
| 13.488797 | <i>per</i>  | scaffold532 | 140498 | Exon23   | A            | 0.18          | 0.77         | 1.03E-07 | 0.00086  | Q            | K           |
| 17.827646 | <i>Pdfr</i> | scaffold87  | 66396  | Exon2    | G            | 0.02          | 0.75         | 1.40E-13 | 1.21E-08 | M            | T           |

**Table 1. Locations of outlier SNPs in PDD QTL.** a) SNPs identified by BayPASS in pool-seq data including the demographic corrected measure of population differentiation ( $XtX$ ), and measures of association with PDD time: pearson  $r$ ,  $\beta$ , Bayes Factor (BF, measured in  $dB$ ),  $eBP_{is}$ , and maximum linkage disequilibrium with other SNPs under the QTL. Outliers in the individual resequencing data case/control analysis ( $P$  values and FDR corrected q-values shown) with long PDD allele (minor allele) and minor allele frequency (MAF) for short and long PDD samples for b) E-box altering SNP and c) amino-acid (AA) altering SNPs. All case-control results listed in Table S9-S10. Position in base pairs (BP) on the scaffold shown.
